# Supplementary figures and images for: Solar irradiation of the seed germination stimulant karrikinolide produces two novel head-to-head cage dimers
Source: Royal Society of Chemistry journal article supplement (doi:10.1039/c2ob25090j), 2012-01-01

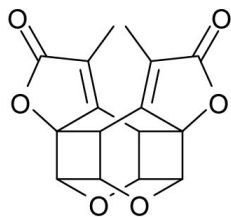

**2**

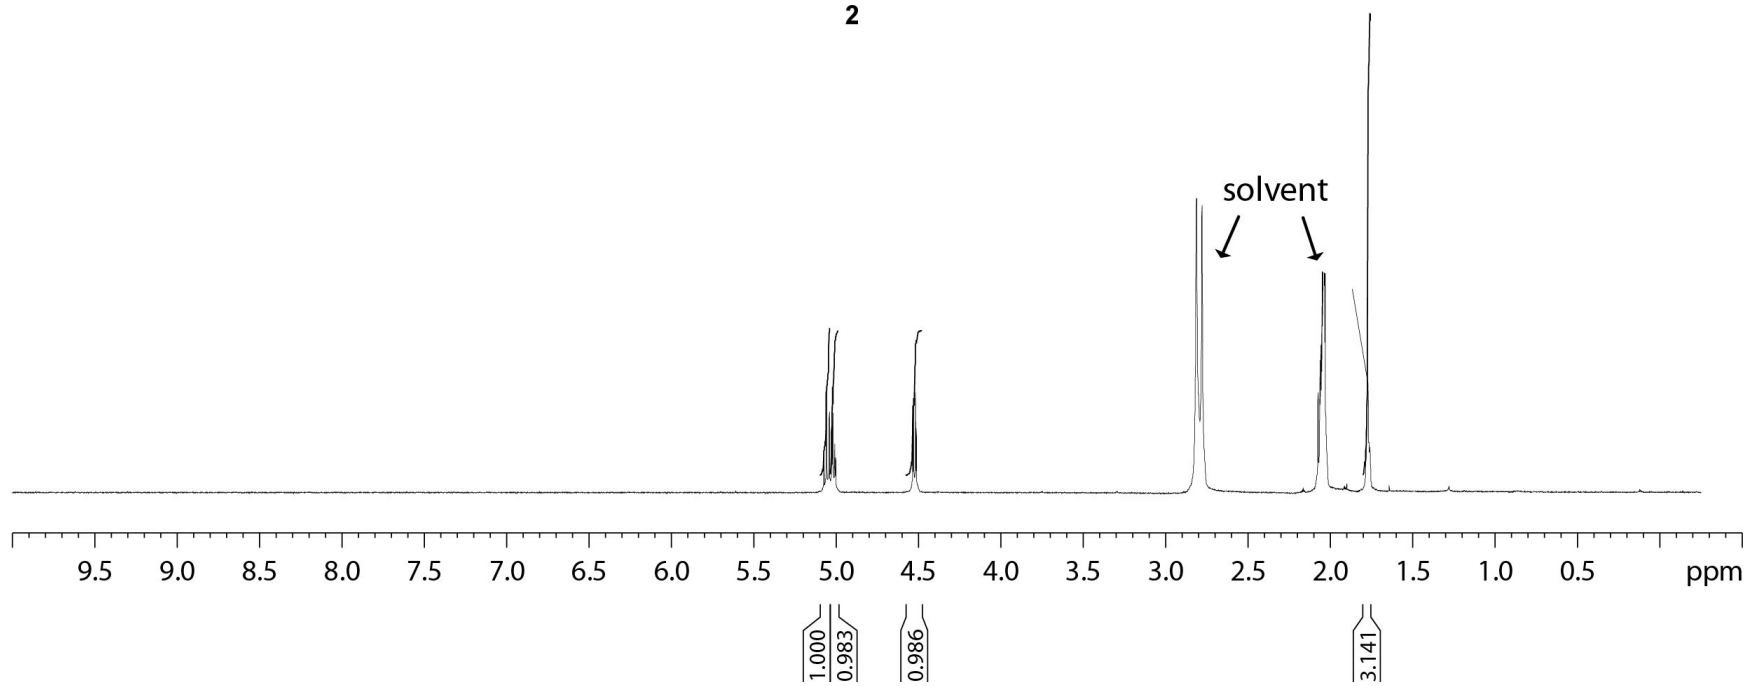

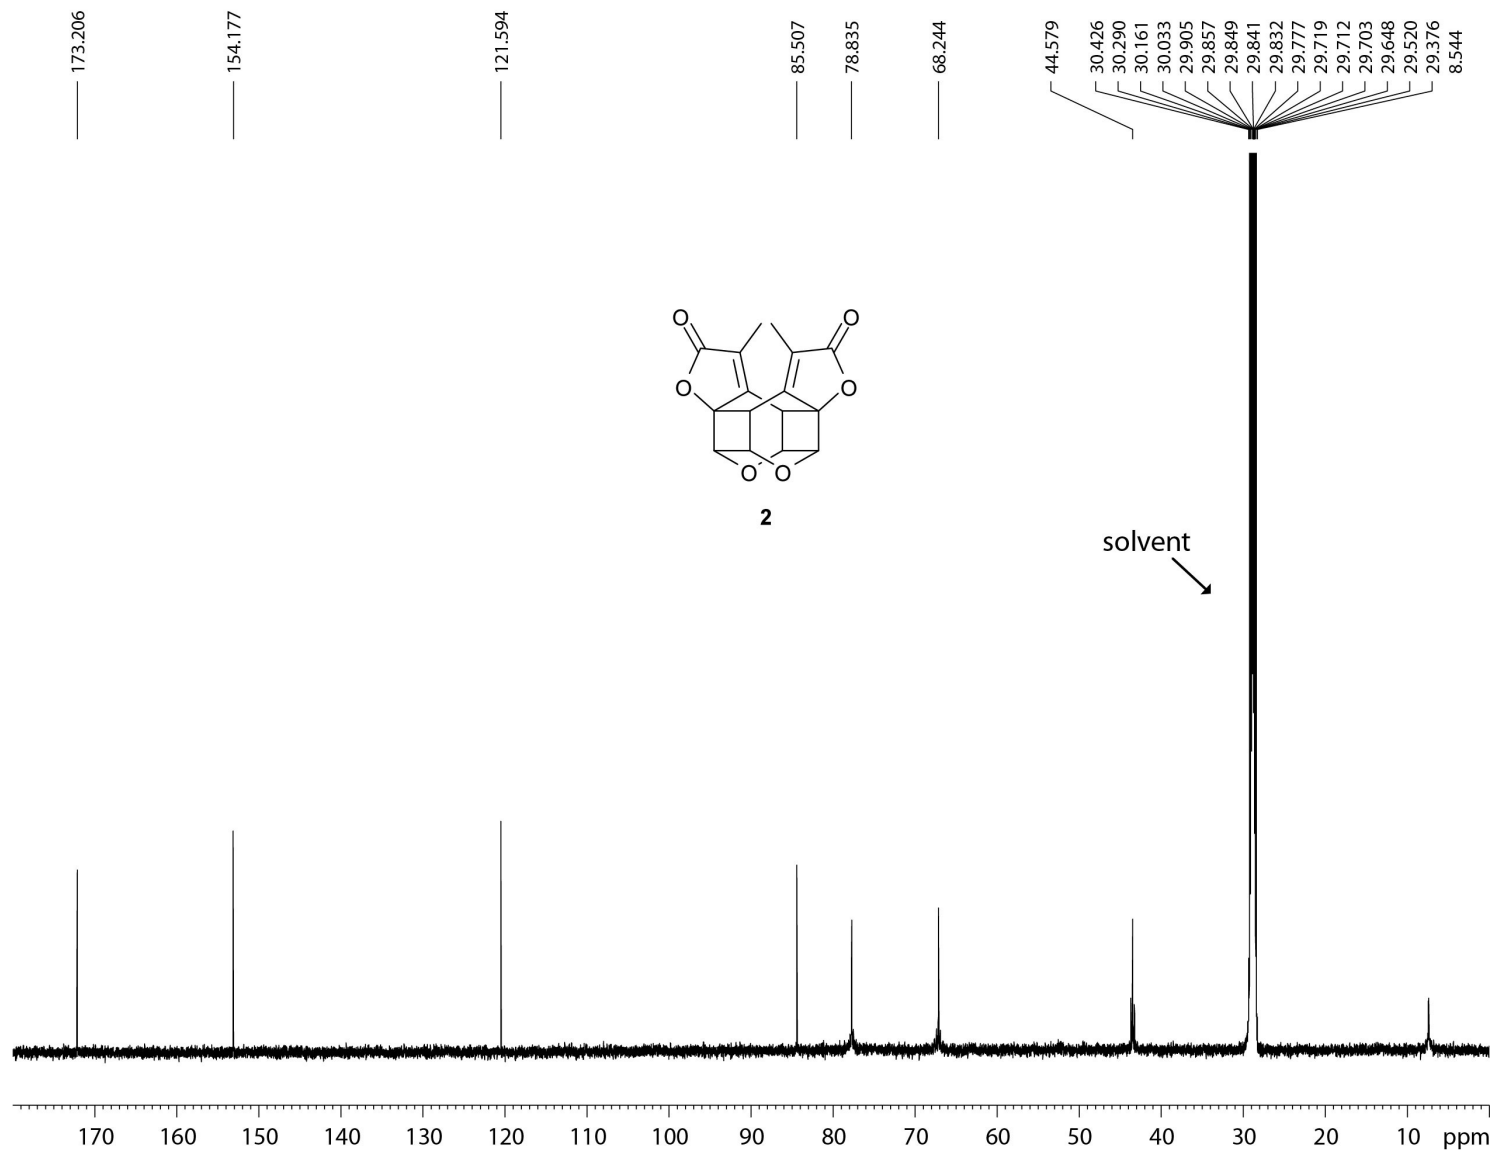

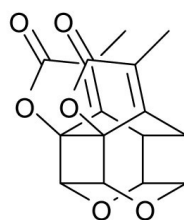

**3**

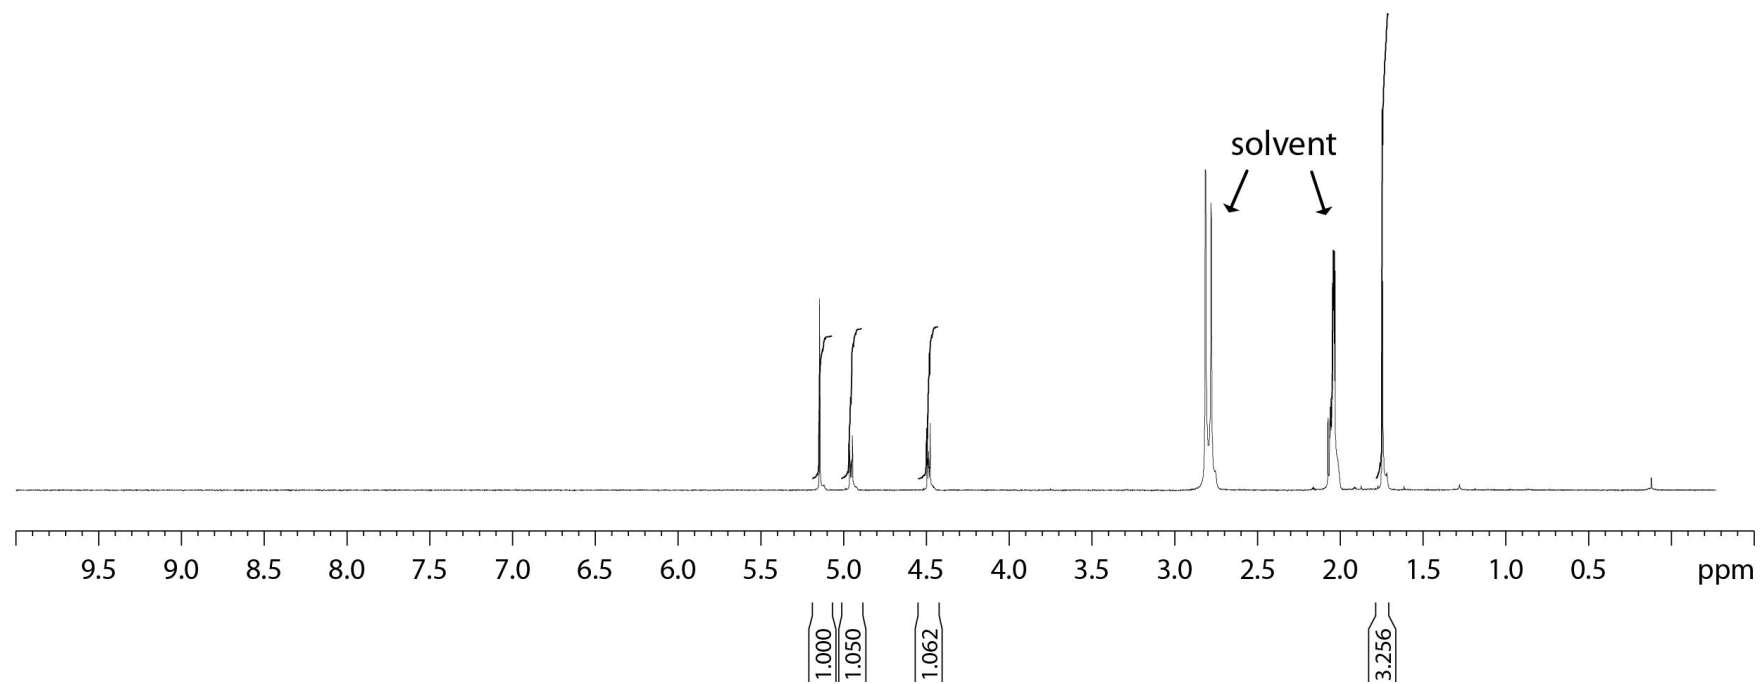

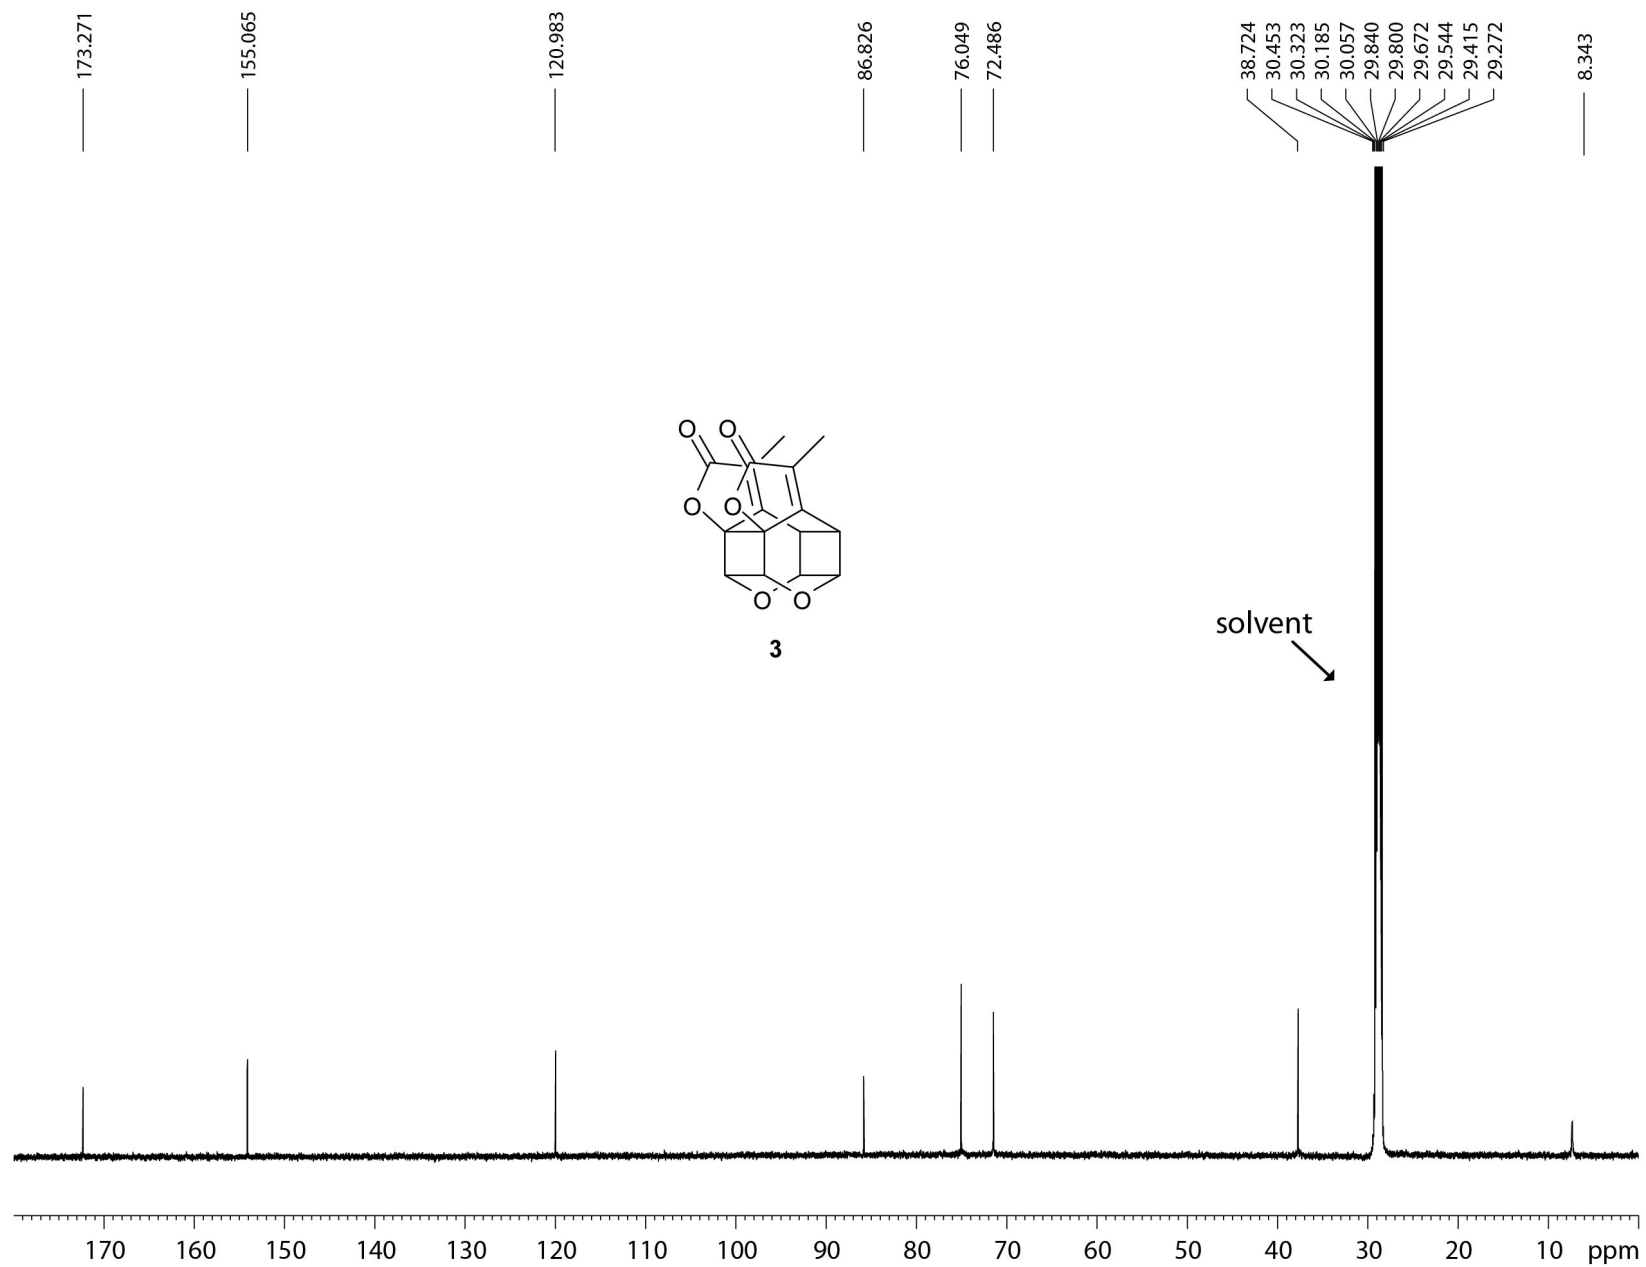

Supplement: c2ob25090j.pdf [file c2ob25090j.pdf]
